# Supplementary material for: The clobazam metabolite N-desmethyl clobazam is an α2 preferring benzodiazepine with an improved therapeutic window for antihyperalgesia
Source: PubMed Central journal article supplement — Neuropharmacology. 2016 Oct;109:366–75. doi: 10.1016/j.neuropharm.2016.07.004 (PMC4981430; doi:10.1016/j.neuropharm.2016.07.004), 2016-10
Supplement: mmc1.pdf [file mmc1.pdf]

## The Clobazam Metabolite N-Desmethyl Clobazam Is an $\alpha 2$ Preferring Benzodiazepine With an Improved Therapeutic Window for Antihyperalgesia

Supplemental figure 1

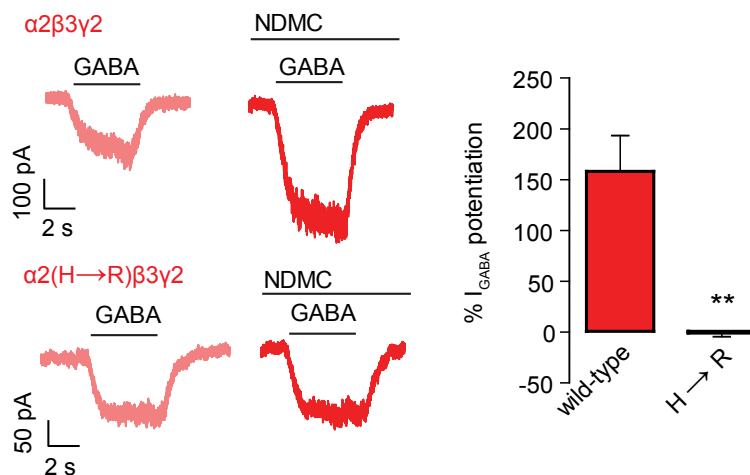

Fig. S1. Lack of modulation by NDMC (20  $\mu M$ ) of  $\alpha 2(H \rightarrow R)\beta 3\gamma 2$  point mutated GABA<sub>A</sub>Rs. Unpaired t test \*\*,  $P < 0.01$

Supplemental figure 2

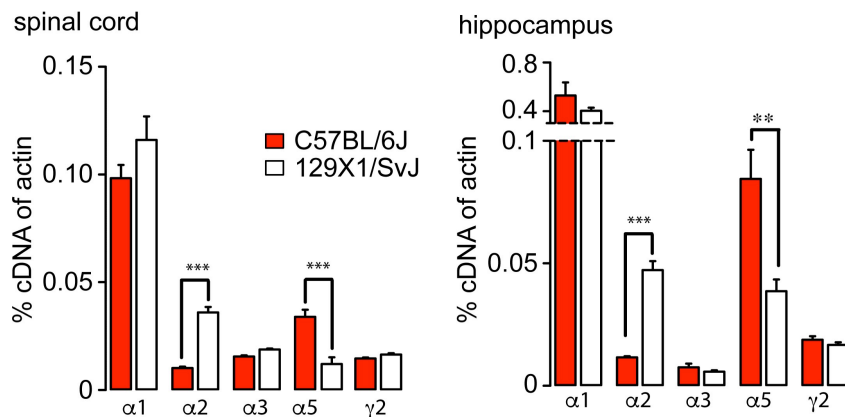

Fig. S2. Expression of four GABA<sub>A</sub>R  $\alpha$  subunits and of the GABA<sub>A</sub>R  $\gamma 2$  subunit in spinal cord and hippocampus of C57BL/6 and 129X1/SvJ mice. Unpaired t tests \*\*\*,  $P < 0.001$ , \*\*,  $P < 0.01$ .
